# Supplementary material
Source: publisher site journal article supplement (https://www.dovepress.com/get_supplementary_file.php?f=323740.docx)
Supplement: Supplementary file 1 [file get_supplementary_file.php]

**Supplement**

**Table S1.** Multidimensional Prognostic Index

| **Assessments** | **Mild**  **(value = 0)** | **Moderate**  **(value = 0.5)** | **Severe**  **(value = 1)** |
| --- | --- | --- | --- |
| MMSE | 30 – 28 | 27 – 25 | ≤ 24 |
| ESS | 20 – 16 | 15 – 10 | 9 – 5 |
| Katz | 6 – 5 | 4 – 3 | 2 – 0 |
| Lawton | 8 – 6 | 5 – 4 | 3 – 0 |
| MNA-SF | ≥ 12 | 11 – 8 | ≤ 7 |
| CIRS-CI | 0 | 1 – 2 | ≥ 3 |
| No. of medications | ≤ 3 | 4 – 6 | ≥ 7 |
| Living situation | Living with family | Institutionalized | Living alone |
| *Abbreviations: CIRS-CI, Cumulative Illness Rating Scale Comorbidity Index; ESS, Exton-Smith Scale; MMSE, Minimal Mental State Exam; MNA-SF, Mini Nutritional Assessment Short Form.* | | | |

**Table S2**. Physical functioning measurements

| Frailty according physical functioning measurement | **All patients**  **N = 163** |
| --- | --- |
| Hand grip strength  Men  < 27 kg  ≥ 27 kg  Women  < 16 kg  ≥ 16 kg | 14 (12.7)  96 (87.3)  6 (12.2)  43 (87.8) |
| Gait speed  ≤ 0.8 m/s  > 0.8 m/s | 26 (16.9)  128 (83.1) |
| TUGT  ≥ 20 s  < 20 s | 12 (7.6)  145 (92.4) |
| *Abbreviations: TUGT, Timed Up and Go Test;*  *Data incomplete for: handgrip strength (Men :N= 110, Women: N = 49), gait speed (N = 154), TUGT (N = 157).* | |
